# Supplementary material for: Toxicity of Bacillus thuringiensis-Derived Pesticidal Proteins Cry1Ab and Cry1Ba against Asian Citrus Psyllid, Diaphorina citri (Hemiptera)
Source: MDPI journal article supplement (doi:10.3390/toxins11030173), 2019-03-22
Supplement: s1 [file s1]

# Supplementary Materials: Toxicity of *Bacillus thuringiensis*-Derived Pesticidal Proteins Cry1Ab and Cry1Ba against Asian Citrus Psyllid, *Diaphorina citri* (Hemiptera)

Maria Teresa Fernandez-Luna, Pavan Kumar, David G. Hall, Ashaki D. Mitchell, Michael B. Blackburn and Bryony C. Bonning

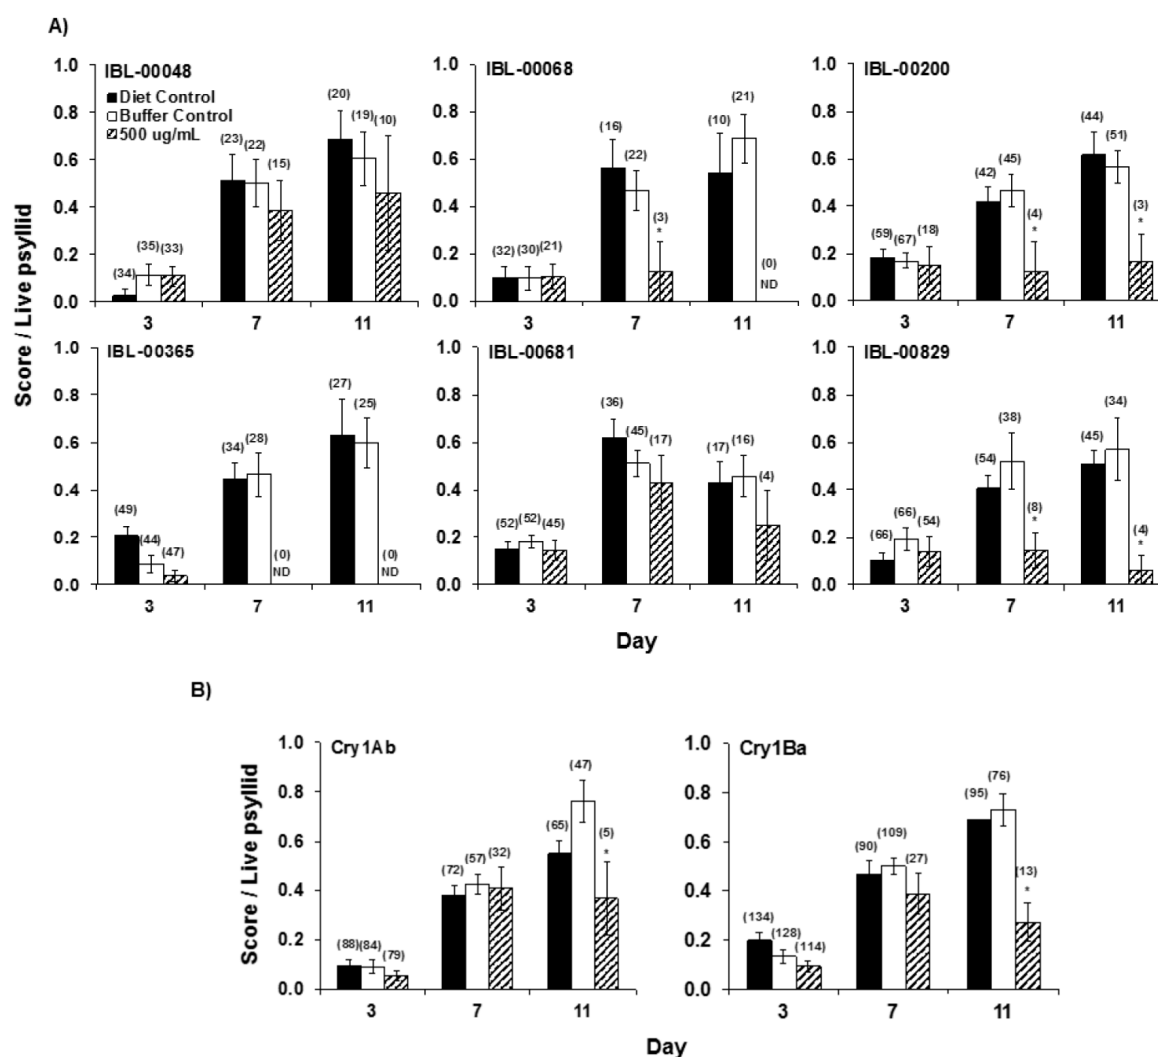

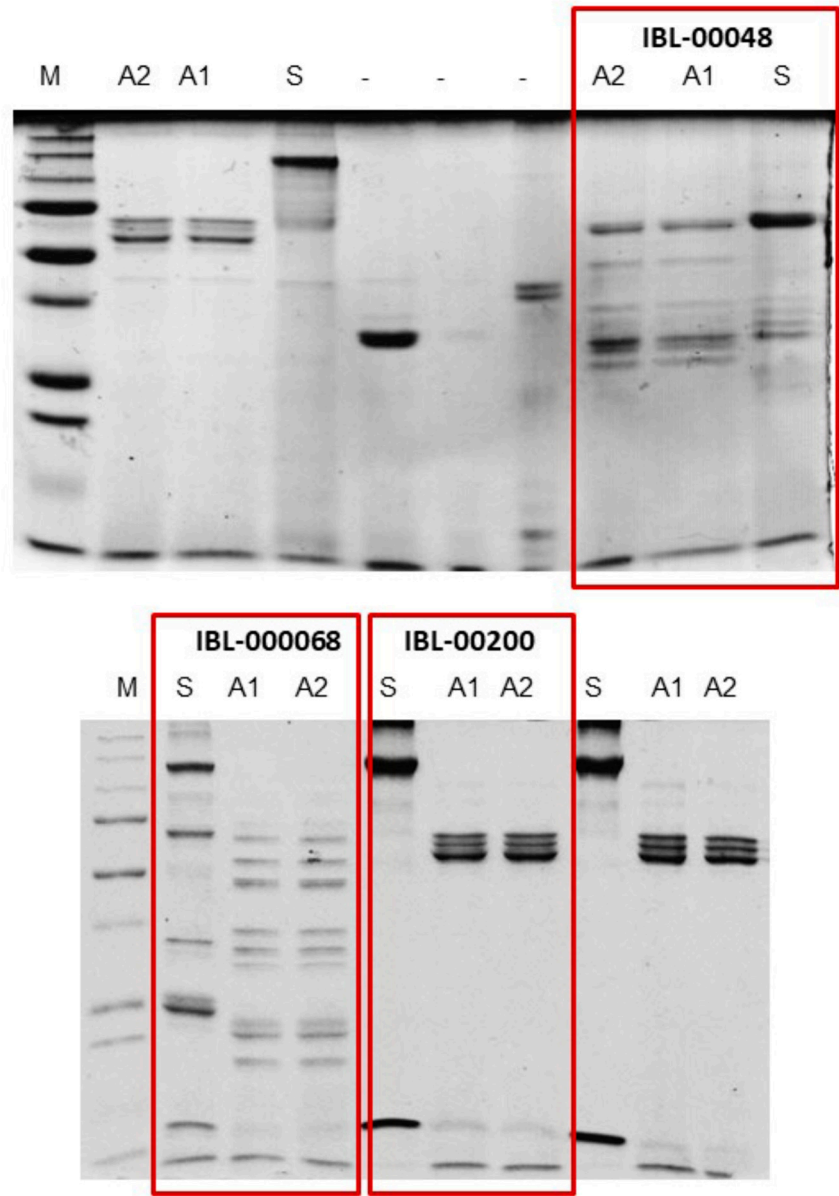

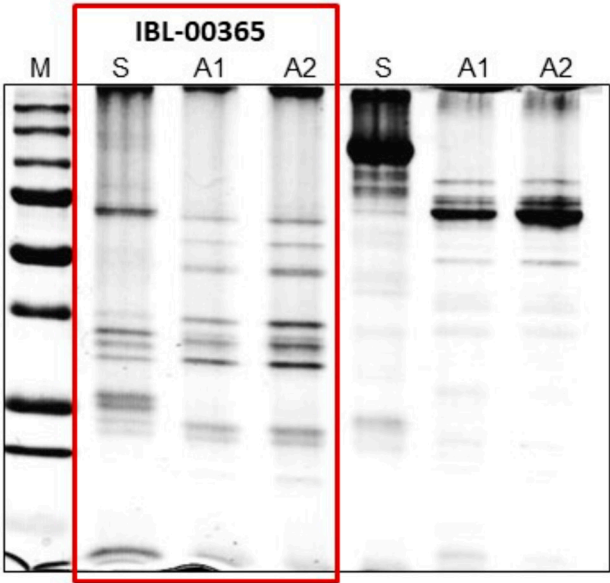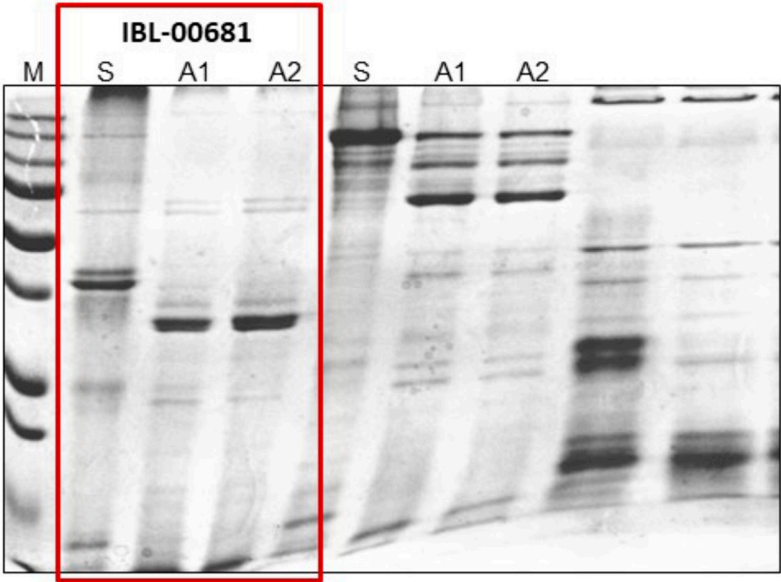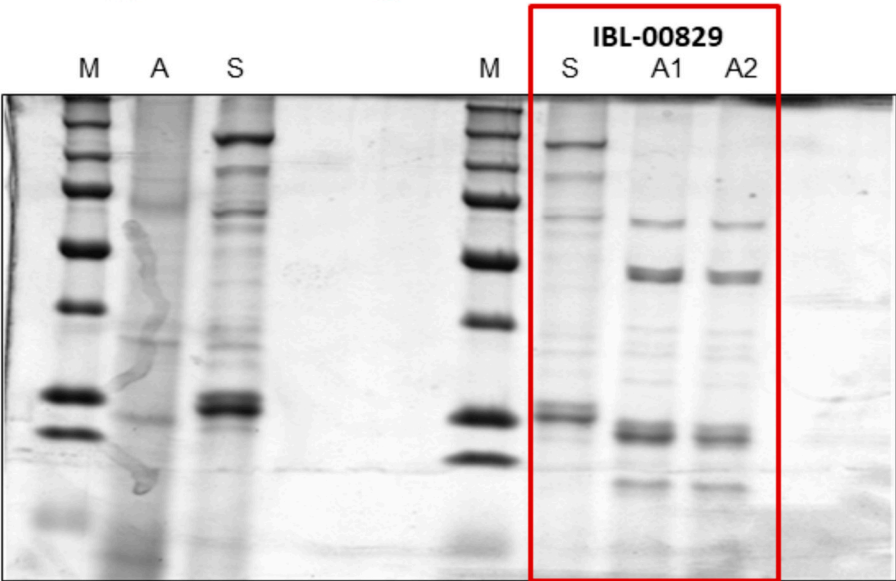

**Figure S2.** Profiles of trypsin-activated toxins derived from *Bt* isolates with toxicity to ACP: Complete gels are shown for the cropped lanes in Figure 1. S: Soluble protein. A: Activated protein treated with 10% Trypsin for 1 h at 37°C. Proteins were separated by SDS-PAGE (12% gel) and stained with Coomassie Blue R. M, molecular mass markers.

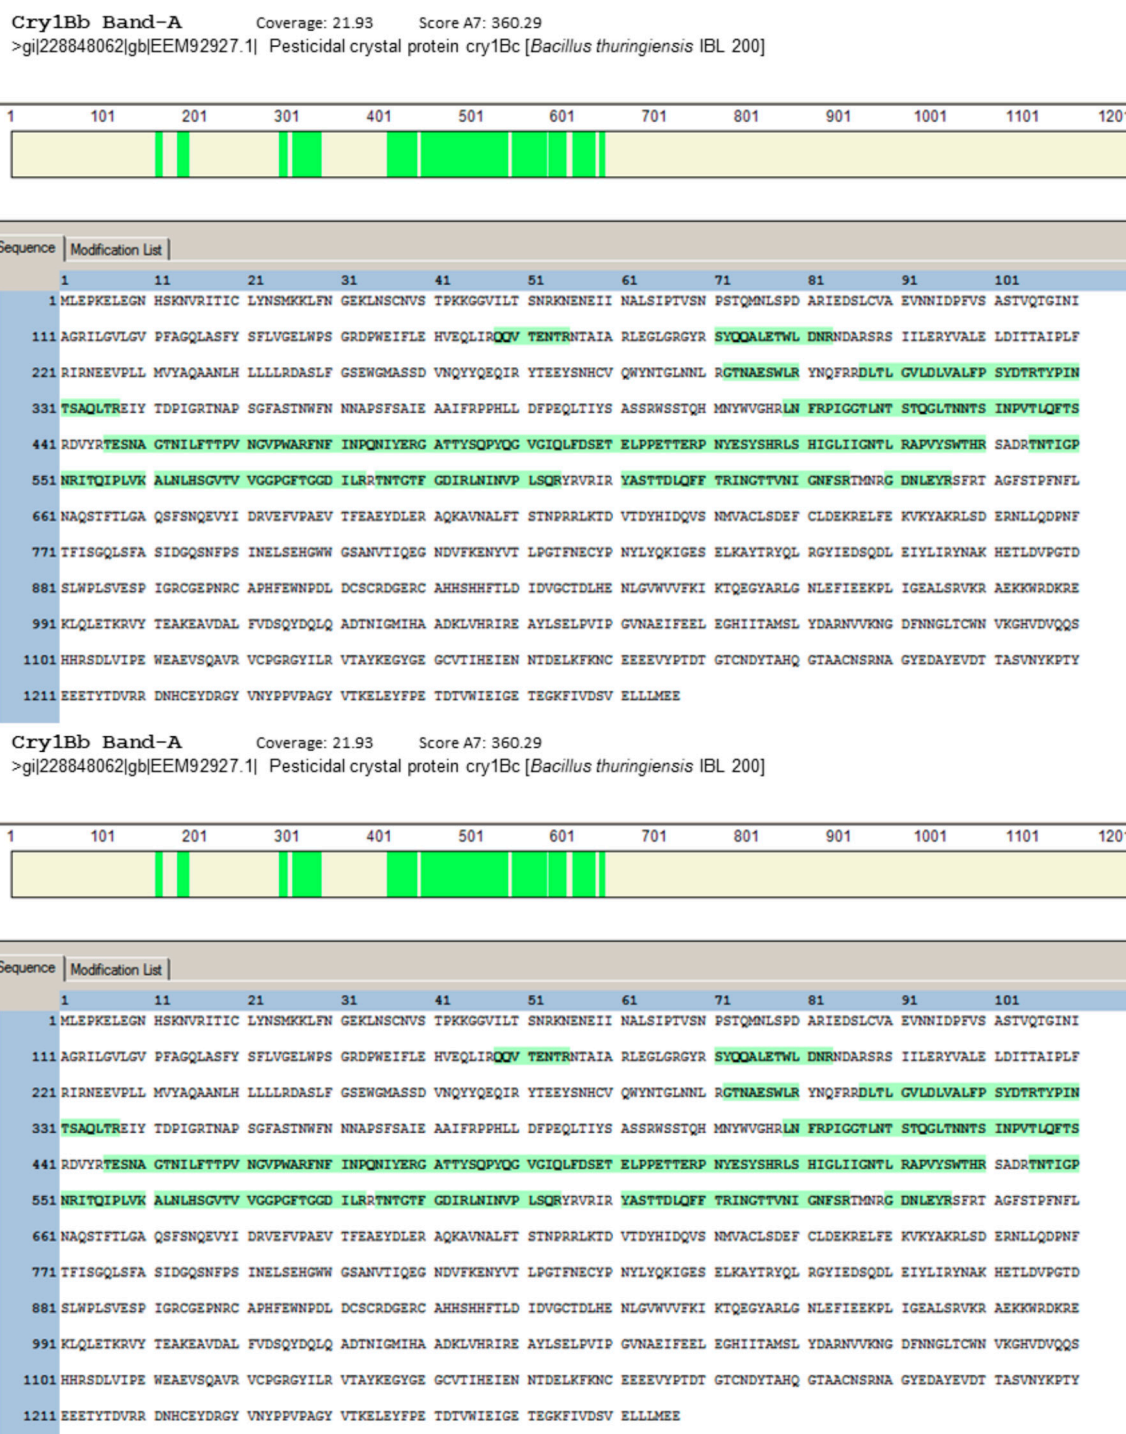

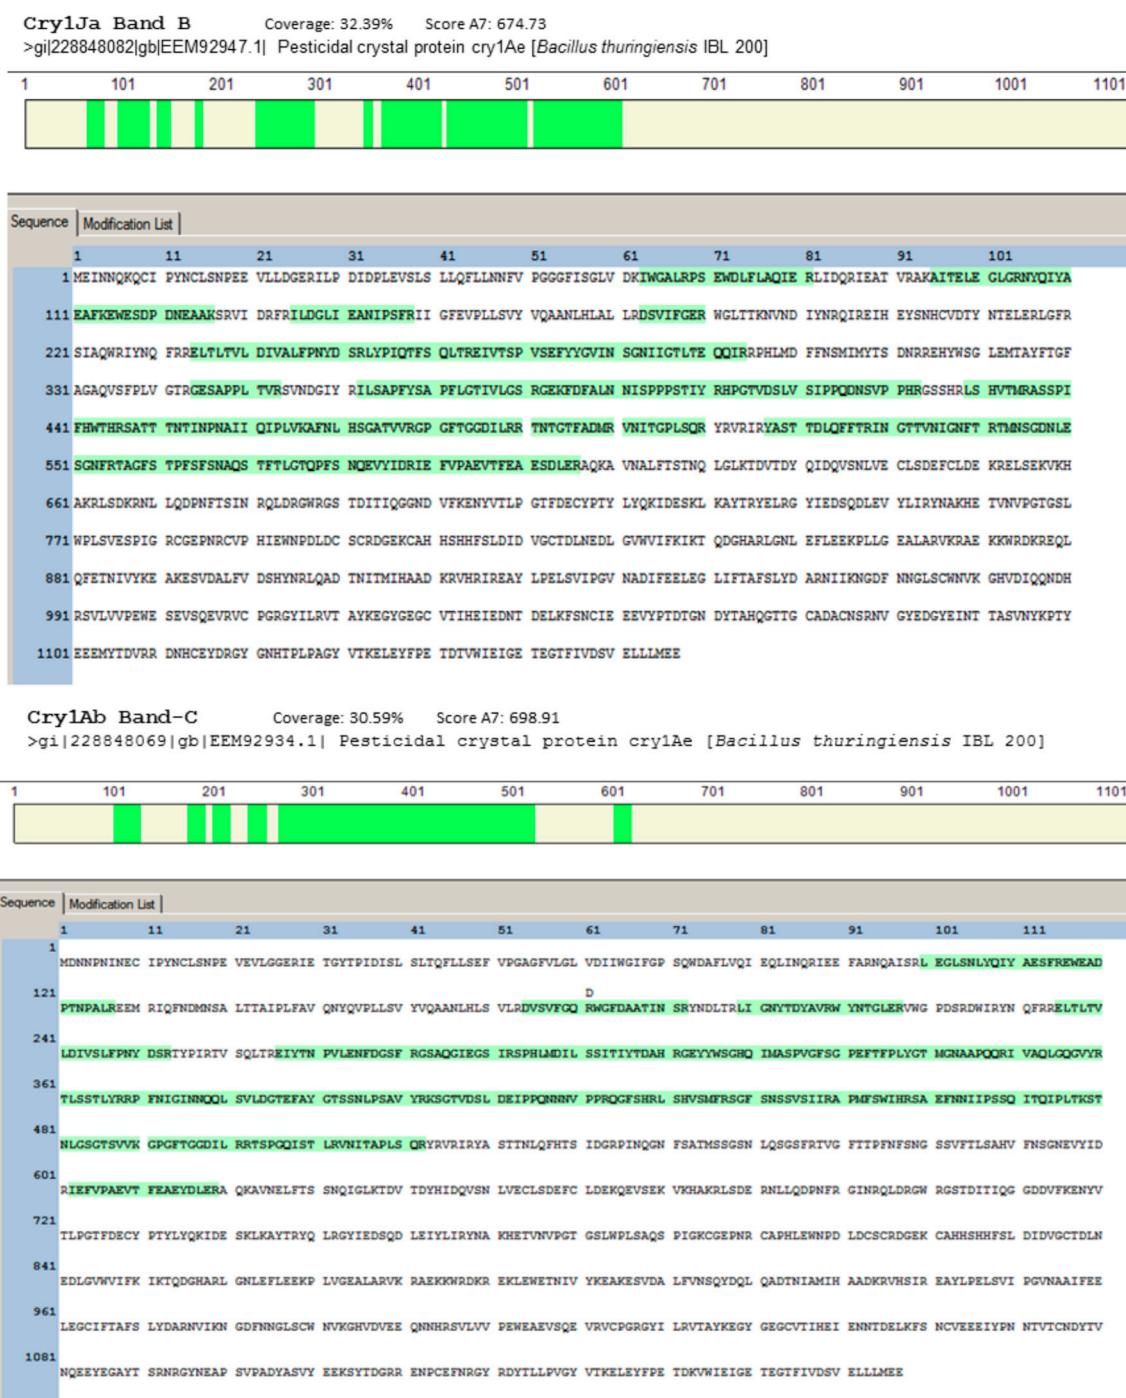

**Figure S3.** Identification of toxins in IBL-00200 by peptide sequencing. Peptide sequences obtained after trypsin treatment of bands A, B and C of strain IBL-00200 are highlighted.

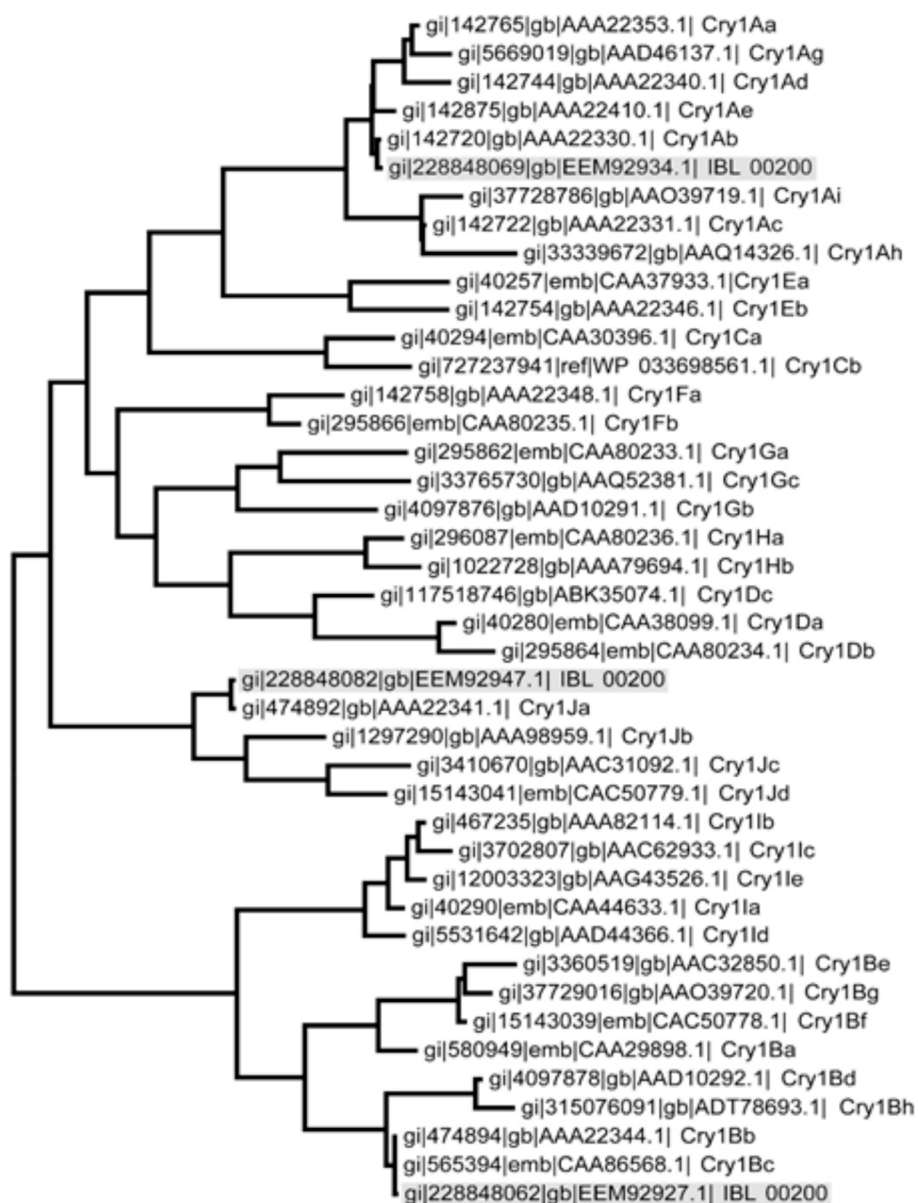

**Figure S4.** Identification of toxins expressed by strain IBL-00200. Two different Cry toxin sequences annotated as Cry1Ae cluster with Cry1Ab and Cry1Ja. One Cry toxin annotated as Cry1Bc clusters with Cry1Bb. Analysis performed with MEGA6 to generate a maximum likelihood tree.

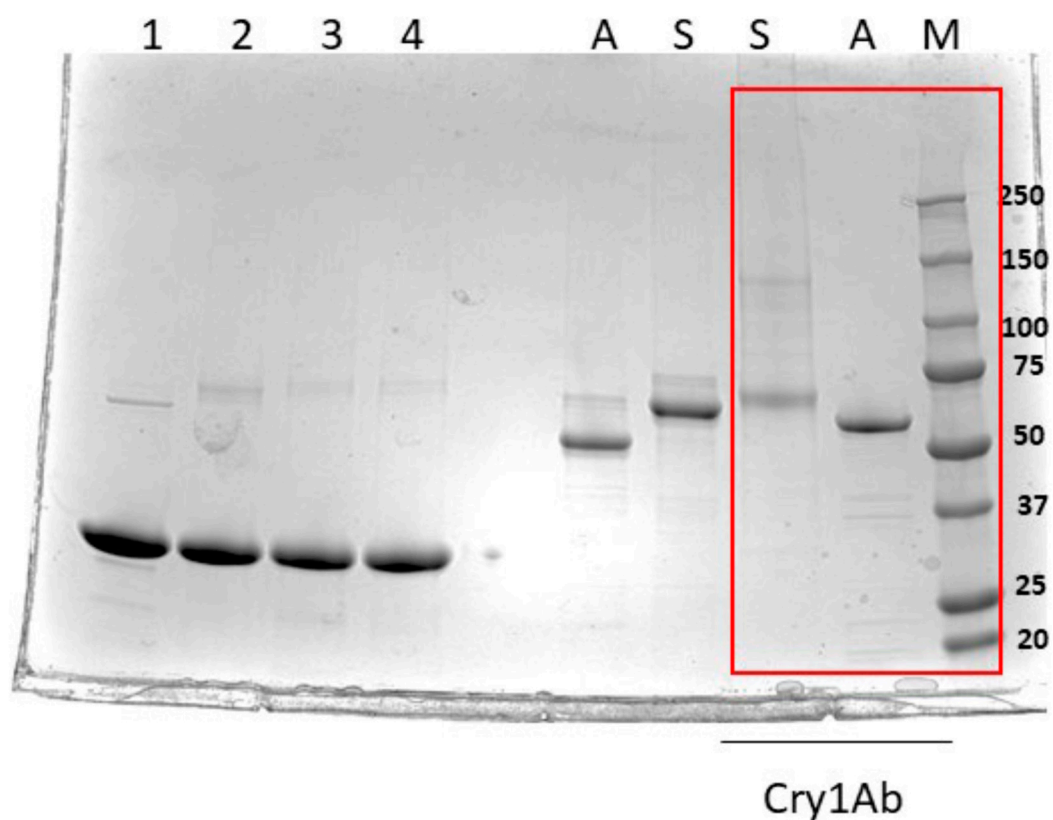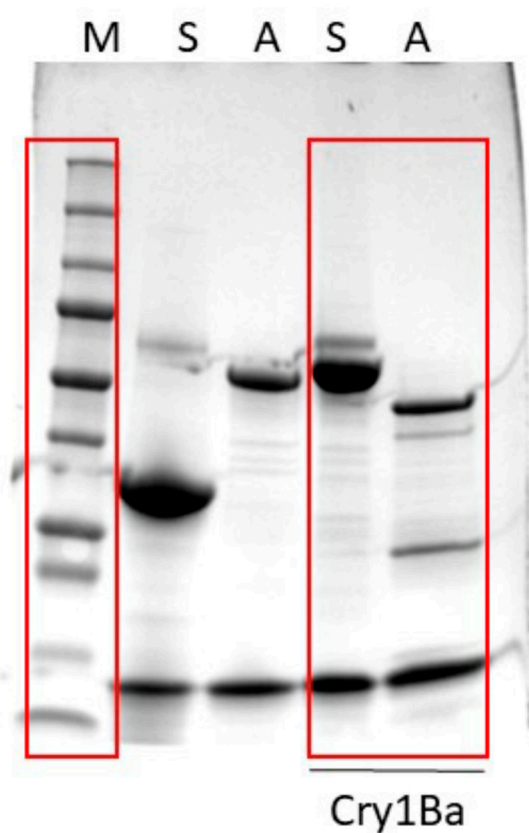

**Figure S5.** Profiles of trypsin-activated *Bt* toxins Cry1Ab and Cry1Ba with toxicity to ACP: Complete gels are shown for the cropped lanes in Figure 2. S: Soluble protein. A: Activated protein treated with 10% Trypsin for 1 h at 37°C. Proteins were separated by SDS-PAGE (12% gel) and stained with Coomassie Blue R. M, molecular mass markers.
